# Supplementary material for: The Risk of SARS-CoV-2 Infection in Pregnant Women: An Observational Cohort Study Using the BIFAP Database
Source: MDPI journal article supplement (doi:10.3390/healthcare10122429), 2022-12-02
Supplement: s1 [file s1]

**Supplemental Table S1.** Baseline characteristics of both cohorts and clinical course of SARS-COV2 among groups

| Characteristics                                       | Comparison Cohort<br>N= 41,2740 |            | Pregnancy Cohort<br>N=10,3185 |            |
|-------------------------------------------------------|---------------------------------|------------|-------------------------------|------------|
| <b>Hospitalized COVID</b>                             | <b>704</b>                      | <b>2.8</b> | <b>549</b>                    | <b>6.4</b> |
| 1 <sup>st</sup> trimester                             | na                              | na         | 12                            | 2.9        |
| 2 <sup>nd</sup> trimester                             | na                              | na         | 5                             | 1.2        |
| 3 <sup>rd</sup> trimester                             | na                              | na         | 394                           | 95.9       |
| <b>ICU COVID</b>                                      | <b>19</b>                       | <b>0.1</b> | <b>5</b>                      | <b>0.1</b> |
| <b>Symptoms recorded in the database (+/- 7 days)</b> |                                 |            |                               |            |
| Cough                                                 | 74                              | 0.3        | 26                            | 0.3        |
| Anosmia                                               | 11                              | 0.0        | 9                             | 0.1        |
| Thoracic pain                                         | 9                               | 0.0        | 1                             | 0.0        |
| Abdominal pain                                        | 19                              | 0.1        | 13                            | 0.2        |
| Headache                                              | 72                              | 0.3        | 27                            | 0.3        |
| Diarrhea                                              | 53                              | 0.2        | 14                            | 0.2        |
| Muscle or body aches                                  | 806                             | 3.2        | 334                           | 3.9        |
| Fever                                                 | 282                             | 1.1        | 85                            | 1.0        |
| Nausea                                                | 22                              | 0.1        | 11                            | 0.1        |
| Nasal Congestion                                      | 13                              | 0.1        | 9                             | 0.1        |
| <b>Complications (0-28 days)</b>                      |                                 |            |                               |            |
| Bronchitis                                            | 11                              | 0.0        | 2                             | 0.0        |
| Pneumonia                                             | 49                              | 0.2        | 19                            | 0.2        |
| Thrombosis                                            | 6                               | 0.0        | 4                             | 0.0        |
| Valvopathy                                            | 1                               | 0.0        | 0.0                           | 0.0        |

There were no recorded patients having tiredness, Bronchiolitis, Distress respiratory syndrome, Disseminated intravascular coagulation and myocarditis.
